# Supplementary material
Source: PubMed Central journal article supplement (PMC5378542)
Supplement: supp_5.1.E74_2016-0113-Original_submission.pdf [file supp_5.1.E74_2016-0113-Original_submission.pdf]

1  
2  
3  
4  
5 Quality Indicators for the Detection and Management of Chronic Kidney Disease in  
6 Primary Care in Canada  
7  
8  
9  
10

11  
12  
13 Karen Tu MD, MSc,<sup>1,2</sup> Lindsay Bevan BA,<sup>4</sup> Katie Hunter MSc,<sup>4</sup> Jess Rogers BA,<sup>4</sup> Jacqueline  
14 Young BCMPH, MSA<sup>1</sup> Gihad Nesrallah, MD, MSc<sup>5,6</sup>  
15  
16  
17  
18  
19

20 1. Institute for Clinical Evaluative Sciences, Toronto, ON; 2. Department of Family and  
21 Community Medicine and Institute of Health Policy, Management and Evaluation, University of  
22 Toronto, Toronto, ON; 3. Centre for Effective Practice, Toronto, ON; 4. Faculty of Medicine,  
23 University of Toronto, Toronto ON; 5. Nephrology Program, Humber River Hospital, Toronto,  
24 ON.  
25  
26  
27  
28  
29  
30  
31

32 Corresponding Author:

33 Karen Tu  
34 c/o ICES  
35 G1 06, 2075 Bayview Avenue  
36 Toronto, Ontario M4N 3M5  
37 Tel (416)480-4055x3871 Fax (416)480-6048  
38 Email karen.tu@ices.on.ca  
39  
40  
41

42 This project was made possible by a grant from the Ontario Renal Network.  
43 None of the authors have any competing interests to declare  
44  
45

46 Word count 2371  
47  
48  
49  
50  
51  
52  
53  
54  
55  
56  
57  
58  
59  
60

## Abstract

### Background

Detection and management of chronic kidney disease (CKD) lie within primary care; however, CKD performance measures applicable in the Canadian context are lacking.

### Methods

We used a modified Delphi panel approach to develop a set of quality indicators for the detection and management of CKD in the primary care setting and then applied those indicators to primary care electronic medical records in the Electronic Medical Record Administrative data Linked Database (EMRALD) to assess the current state of primary care detection and management of CKD in Ontario.

### Results

Delphi panelists agreed upon 17 primary care CKD quality indicators. After application in 140,147 adult patients in EMRALD we found that 4.9% of the adult population had stage 3+CKD with the average age being 76.1 years (SD 11.0) and 62.9% female. Family physicians were not prescribing non-steroidal anti-inflammatories, not prescribing angiotensin converting enzyme inhibitors and angiotensin receptor blockers concomitantly and appropriately monitoring the estimated glomerular filtration rates (eGFRs) and blood pressures in their CKD patients. However physicians may not be recognizing their CKD patients as 69.9% of patients with CKD did not have documentation of this in their active problem list or past medical history fields in their electronic medical records. Additionally we found that physicians were not performing repeat testing of abnormal eGFRs and not performing albumin to creatinine ratio testing when indicated.

### Interpretation

We propose a measurement set for evaluating the quality of primary CKD care, and identified opportunities to improve current practices in Ontario using targeted interventions.

## Introduction

Chronic kidney disease (CKD) is common. The median prevalence of CKD among adults aged 30 or older is estimated to be 7.2%, and between 23.4% to 35.8% for people over 64.<sup>1</sup> CKD has a prevalence similar to diabetes<sup>2</sup> and engenders at least the same amount of risk for cardiovascular events and mortality<sup>3-6</sup> yet does not get as much attention with respect to quality improvement. Studies in Canada,<sup>7,8</sup> the US,<sup>9-11</sup> UK<sup>12,13</sup> and Australia<sup>14,15</sup> have universally identified gaps in care and knowledge about CKD among patients and providers in both primary care and specialist settings.

Many countries have guidelines for the management of CKD<sup>16-18</sup> including Canada.<sup>19</sup> In 2014, the Kidney Disease Improving Global Outcomes (KDIGO) group published international CKD guidelines.<sup>20</sup> CKD-related measures are not currently included in the American Healthcare Effectiveness Data and Information Set (HEDIS) measures<sup>21</sup> and the Quality and Outcomes Framework (QOF) in the UK includes only one measure specific to CKD.<sup>22</sup> National primary care quality indicators in Canada<sup>23</sup> currently include no CKD-related measures.

Thus we set out to 1) develop a set of primary care quality indicators for CKD in the Canadian setting and 2) assess the current state of CKD detection and management in the primary care setting, using electronic medical record (EMR) data from a representative sample of Ontario physicians and patients.

## Methods

### *Quality Indicator Selection*

We used a modified Delphi approach to establish a CKD quality indicator measurement set for primary care. First we used a multi-faceted search strategy of the peer-reviewed and grey literature sources to identify CKD-related measures used by other organizations. Then we performed a focused search to identify high quality clinical practice guidelines, using AGREE

1 II<sup>24</sup> criteria, specific to the diagnosis and management of CKD, from which we extracted  
2  
3  
4 recommendations for consideration by the Delphi panel as evidentiary support for the identified  
5  
6 measures. We did not use recommendations from clinical practice guidelines to develop new  
7  
8 indicators. (see Appendix A for details on search strategy)  
9

10 We identified 174 measures published by 26 sources (see Figure 1). Our project clinical  
11  
12 leads in primary care (KT) and nephrology (GN) reviewed these measures for relevance to CKD  
13  
14 in the primary care setting, and retained 89 (Appendix B) for prioritization by a Delphi panel.  
15  
16

17 We recruited 20 panel members from across Canada. Ten were family physicians, seven  
18  
19 were nephrologists with clinical and methodological expertise, a patient, a primary care nurse  
20  
21 and a pharmacist for participation in a modified Delphi process. Each panel member completed a  
22  
23 Conflict of Interest and Consent Form. Panelists completed three rounds of ratings of candidate  
24  
25 measures using a web-based tool and a criteria matrix based on an adaptation from previously  
26  
27 established criteria<sup>25,26</sup> (Figure 2). Panelists participated in one webinar after the first round, to  
28  
29 allow for discussion and consensus building. Panelists provided qualitative feedback during the  
30  
31 review, and could propose new measures. Measures were excluded at each round according to  
32  
33 the criteria in Figure 3. Panelists reviewed their own responses, the panel's aggregate responses  
34  
35 and qualitative feedback at each round. The study team considered qualitative feedback and  
36  
37 Canadian practice guidelines in modifying selected candidate measures to align with Canadian  
38  
39 standards (e.g. blood pressure targets). Following three rounds of rating and the webinar,  
40  
41 indicators that met the 'inclusion' criteria (see Figure 3) were reviewed by the panel and clinical  
42  
43 leads for face validity and comprehensiveness to derive the final measurement set.  
44  
45  
46  
47  
48  
49  
50  
51  
52

### 53 *Measurement of Quality Indicators*

54  
55  
56  
57  
58  
59  
60

1 Using our final measurement set, we performed a current state analysis of CKD detection and  
2 management practices in a convenience sample of Ontario residents and physicians. We used the  
3 Electronic Medical Record Administrative data Linked Database (EMRALD), which captures  
4 clinically relevant data contained in nearly 400 family physician EMRs distributed across  
5 Ontario. The representativeness of EMRALD patients and physicians along with the quality and  
6 comprehensiveness of EMRALD data has been previously found to be generally reflective of the  
7 Ontario population.<sup>27,28</sup>

8  
9  
10  
11  
12  
13  
14  
15  
16  
17  
18 In order to operationalize our measures using EMR data, we introduced a number of  
19 additional specifications. We included patients > 18 years at index date with and an EMR record  
20 that began at least one year prior to the extraction of the EMR data in the summer/fall of 2014.  
21 For indicators for patients with CKD, we identified patients with stage 3+ CKD as having a most  
22 recent eGFR <60 mL/min/1.73m<sup>2</sup> and a second abnormal reading at least three months prior. We  
23 excluded patients with CKD receiving dialysis as documented in the cumulative patient profile.  
24 For the first indicator, ‘The primary care provider can identify patients’ in their practice aged 18  
25 or over with CKD’, the proxy EMR measure was a recording of CKD or its synonyms in the  
26 cumulative patient profile, a searchable EMR module which contains a ‘history of past health’  
27 and active ‘problem list’. For the two indicators that were written as ‘...initial eGFR <60  
28 mL/min/1.73m<sup>2</sup>...’, we defined ‘initial’ as the first eGFR at least six months prior to the date the  
29 data was extracted to allow for at least six months to look for a repeat test or albumin/creatinine  
30 ratio (ACR) test. For the ‘percentage of patients with CKD that had a serum potassium test 7-30  
31 days after the initial angiotensin converting enzyme (ACE) inhibitor /angiotensin II receptor  
32 blocker (ARB) prescription’, we only included patients with ACE inhibitor/ARB prescriptions  
33 after a full year of no ACE inhibitor/ARB prescription, thus ensuring new-user status among  
34 individuals in the denominator. For the indicator ‘percentage of patients with CKD  
35  
36  
37  
38  
39  
40  
41  
42  
43  
44  
45  
46  
47  
48  
49  
50  
51  
52  
53  
54  
55  
56  
57  
58  
59  
60

1 simultaneously receiving both an ACE inhibitor and an ARB', the numerator only included  
2 patients that received a prescription for both types of medications on the same day.  
3  
4

5 We used validated methods for identifying patients with diabetes<sup>29,30</sup> and included  
6 patients with hypertension that had: 1) hypertension recorded in their cumulative patient profile,  
7 or 2) had an elevated blood pressure and a prescription for an antihypertensive on the same day  
8 and a prescription for an antihypertensive in the past 18 months, or 3) met Canadian  
9 Hypertension Education Program Criteria for hypertension at any time in their EMR record and  
10 an elevated blood pressure or antihypertensive prescription in the past 18 months. This  
11 algorithm had a sensitivity of 81.1%, specificity 97.7%, positive predictive value 93.2% and  
12 negative predictive value of 93.1% in a validation study of 969 randomly selected adults  
13 comparing EMRALD with chart-abstracted data.<sup>31-33</sup>  
14  
15  
16  
17  
18  
19  
20  
21  
22  
23  
24  
25  
26

27 All analyses were done in SQL Server Management Studio 2012. The Sunnybrook  
28 Health Sciences Research Ethics Board approved both phases of the project.  
29  
30  
31  
32  
33

## 34 **Results**

35 The response rate for all three of the rating rounds of the panel process was 100%.  
36  
37 Seventeen indicators made up the final list with one under the category Prevalence, Incidence  
38 and Mortality, four under Screening, Diagnosis and Risk Factors, eleven under Management and  
39 one under Referral to a Specialist (Table1). There were two categories, System Level and  
40 Lifestyle for which no indicators met the inclusion criteria. The panel acknowledged through  
41 discussion that though important, System Level indicators are likely outside of the family  
42 physicians' control. Lifestyle-related indicators (e.g. smoking cessation, dietary, exercise  
43 counselling) did not get included as the panel rated them low in feasibility to measure in the  
44 EMR.  
45  
46  
47  
48  
49  
50  
51  
52  
53  
54  
55  
56  
57  
58  
59  
60

1 Overall, of the 140,147 eligible adult patients in EMRALD, 101,561 (72.5%) had at least  
2 one eGFR in their chart and although only 76935 (54.9%) of patients had at least two eGFRs  
3 recorded in their chart, 16585 of 17299 (95.9%) of the patients with an eGFR <60  
4 mL/min/1.73m<sup>2</sup> had at least 1 additional eGFR test. There were 154 dialysis recipients and  
5 6848/139993 (4.9%) had stage 3+ CKD. The average age of the EMRALD cohort was 50.0 years  
6 (SD 18.3) with 57.2% female; the average age of our stage 3+ CKD cohort in EMRALD was  
7 76.1 years (SD 11.0) with 62.9% being female. The average duration of the EMR record was 5.8  
8 years (SD 2.9). Among our patients with stage 3+ CKD, 32.9% had diabetes and 70.3% had  
9 hypertension compared to 10.6% with diabetes and 23.1% with hypertension in our general  
10 EMRALD population.  
11  
12  
13  
14  
15  
16  
17  
18  
19  
20  
21  
22  
23

24 Family physician performance was highest in avoiding NSAIDs, avoiding simultaneous  
25 prescription of ACE inhibitors and ARBs, and measuring eGFR and blood pressure in patients  
26 with stage 3+ CKD, with over 80% adherence in these measures (See Table 2). As well, over  
27 70% of patients with a clinical indication were on an ACE inhibitor or ARB and had an eGFR  
28 measured if at high risk for CKD. Less than 70% of applicable patients had a referral to a  
29 nephrologist, had an influenza vaccine, met blood pressure targets, were on a statin, or had a  
30 potassium test 7 to 30 days after initiation of an ACE inhibitor or ARB. Less than 50% of  
31 patients at risk for CKD had an ACR done, had their CKD documented in their cumulative  
32 patient profile, had a repeat of their initial eGFR < 60 mL/min/1.73m<sup>2</sup> within six months or had  
33 an ACR in patients at risk for CKD.  
34  
35  
36  
37  
38  
39  
40  
41  
42  
43  
44  
45  
46  
47  
48  
49  
50

## 51 Interpretation

52 Through a modified Delphi process we, established a set of primary care indicators for  
53 CKD detection and management in a Canadian context. Additionally, we were able to  
54 demonstrate the feasibility of measuring these indicators to gain an understanding of the current  
55  
56  
57  
58  
59  
60

1 state of the detection and management of CKD in the primary care setting in Ontario. This has  
2  
3  
4 allowed us to identify gaps in care and ascertain areas that should be targeted for improvement.  
5

6 Our measures span a broad range of identified measurement domains and concepts. A  
7  
8 US-based panel identified 12 measures for the primary care management of CKD.<sup>34</sup> Most were  
9  
10 conceptually similar to ours in terms of identifying important actions in the management of  
11  
12 CKD, though differed slightly in their definitions of time frames for actions. Only an annual  
13  
14 complete blood count for patients with stage 3b-5 CKD, and avoidance of bisphosphonates in  
15  
16 patients with eGFR <30 were included in the US indicators but not in ours. Recently a Japanese  
17  
18 team followed a modified Delphi method to identify a set of quality indicators for the care of  
19  
20 CKD in the primary care setting.<sup>35</sup> They selected 11 indicators of which seven were conceptually  
21  
22 similar to ours, with four measures not included in our set: prevention of contrast induced  
23  
24 nephropathy, glycemic control of diabetes in CKD, avoidance of biguanides in diabetes, and  
25  
26 quarterly urine testing. With respect to lipid management in CKD, our indicator measured statin  
27  
28 prescribing, which is within the provider's control. The US-based panels' indicator required  
29  
30 cholesterol testing and the Japanese indicator was based on achieving a cholesterol target, which  
31  
32 is not necessarily within the provider's control.  
33  
34  
35  
36  
37  
38

39 We found the lack of documentation in problem lists or past medical history of CKD by  
40  
41 family physicians consistent with other studies identifying the lack of recognition of CKD by  
42  
43 primary care physicians.<sup>13,36</sup> Although our indicator methodology differed slightly from previous  
44  
45 measures in the primary care setting in the US, we found similar rates of lipid lowering  
46  
47 medication use (~60%) and avoidance of NSAID prescribing in CKD.<sup>37</sup>  
48  
49  
50

51 Our prevalence rates for stage 3+ CKD (4.9%) were lower than identified elsewhere but  
52  
53 other studies based their CKD diagnosis on a single eGFR measure and did not exclude patients  
54  
55 that were on dialysis.<sup>13,37</sup> The higher prevalence of CKD in women that we found was similar to  
56  
57  
58  
59  
60



1 that found in the United Kingdom and in the US and the rates of diabetes and hypertension were  
2 similar to the American rates but higher than that found in the United Kingdom.<sup>13,37</sup>  
3  
4

5  
6 Our study has some limitations. It was necessary to modify some of the indicators for  
7 measurement as we only had laboratory data as far back as the date of creation of each EMR  
8 record. Therefore, we could not confirm disease onset and duration as we could not be certain  
9 that the first occurrence of eGFR <60 mL/min/1.73m<sup>2</sup> in the EMR was the first ever for a given  
10 patient. This limitation required us to redefine 'initial' in indicators measuring repeat testing after  
11 the initial eGFR < 60 mL/min/1.73m<sup>2</sup>. It is possible that if we had the initial eGFR that our  
12 measured performance rate for repeat or ACR testing may have been higher. However, it is  
13 unlikely that it would have been significantly higher given the low rate of ACR testing in  
14 general. In Ontario the eGFR is typically provided when serum creatinine is ordered and  
15 calculated at the laboratory using the Modification of Diet in Renal Disease (MDRD) equation.<sup>38</sup>  
16 However the MDRD equation only takes into account white (Caucasian) and African American  
17 and does not consider the ethnic diversity of the Ontario population. Ethnicity is not typically  
18 provided when the laboratory test is ordered thus it is likely that even the correction factor for  
19 African Americans is not applied. The MDRD equation may underestimate eGFR and therefore  
20 may have led to an over diagnosis of CKD. More recently in 2015 Ontario laboratories have  
21 switched to using the Chronic Kidney Disease Epidemiology Collaboration (CKD-EPI) equation  
22 <sup>39</sup> which is considered to be more accurate especially for females and the younger population but  
23 this change occurred after the conduct of this analysis. It is also possible that influenza vaccines  
24 were given to patients but not recorded in the EMR record as patients in Ontario may receive  
25 influenza vaccines outside of the family physician office, for instance in shopping malls,  
26 pharmacies or public health units and the completeness of this recording in EMR records is  
27 unknown. Additionally, we did not have access to medication duration and precise medication  
28 discontinuation dates and therefore we were required to make estimates on timing and duration  
29  
30  
31  
32  
33  
34  
35  
36  
37  
38  
39  
40  
41  
42  
43  
44  
45  
46  
47  
48  
49  
50  
51  
52  
53  
54  
55  
56  
57  
58  
59  
60

1 for medication indicators. We have been unable to identify similar CKD quality indicator  
2 measurement in other provinces in Canada, however it is hopeful with the release of these  
3 indicators, other provinces may be able to do comparable analysis in the future. Last we are  
4 limited by identifying patients with CKD through the lab tests in the EMR, and it is likely that  
5 laboratory tests ordered by specialists or in hospital are not accounted for in our analysis.  
6  
7  
8  
9  
10  
11  
12

13 We have developed a set of quality indicators for the detection and management of CKD that  
14 are feasible to measure. Through our application of these indicators to real world primary care  
15 EMR data, we have identified areas that need improvement. Next steps for members of our team  
16 are to perform a cluster randomized-controlled trial with tools developed to target these  
17 identified care gaps.  
18  
19  
20  
21  
22  
23  
24  
25  
26

## 27 **Acknowledgements**

28 This project was made possible by a grant from the Ontario Renal Network. This study was  
29 supported by the Institute for Clinical Evaluative Sciences (ICES), which is funded by an annual  
30 grant from the Ontario Ministry of Health and Long-Term Care (MOHLTC). The opinions,  
31 results and conclusions reported in this paper are those of the authors and are independent from  
32 the funding sources. No endorsement by ICES or the Ontario MOHLTC is intended or should be  
33 inferred. The authors would like to thank all the members of the panel for their participation and  
34 expertise (Dr. Adeera Levin, Dr. Allan Grill, Dr. Amit Garg, Betty Hogeterp, Dr. Blaise  
35 Clarkson, Dr. Brenda Hemmelgarn, Dr. Brian Hutchison, Dr. Elizabeth Muggah, Dr. Francois  
36 Madore, Dr. Kevin Samson, Dr. Liisa Jaakkimainen, Michael McCormick, Dr. Noah Ivers, Dr.  
37 Patricia Marr, Dr. Roland Grad, Dr. Scott Brimble, Dr. Sharon Johnston and Dr. Sheldon Tobe).  
38  
39  
40  
41  
42  
43  
44  
45  
46  
47  
48  
49  
50  
51  
52  
53  
54  
55  
56  
57  
58  
59  
60

## References

1. Zhang QL, Rothenbacher D. Prevalence of chronic kidney disease in population-based studies: systematic review. *BMC Public Health*. 2008;8:117.
2. Lipscombe LL, Hux JE. Trends in diabetes prevalence, incidence, and mortality in Ontario, Canada 1995-2005: a population-based study. *Lancet*. Mar 2007;369(9563):750-756.
3. Go AS, Chertow GM, Fan D, McCulloch CE, Hsu CY. Chronic kidney disease and the risks of death, cardiovascular events, and hospitalization. *N Engl J Med*. Sep 2004;351(13):1296-1305.
4. Keith DS, Nichols GA, Gullion CM, Brown JB, Smith DH. Longitudinal follow-up and outcomes among a population with chronic kidney disease in a large managed care organization. *Arch Intern Med*. Mar 2004;164(6):659-663.
5. Johnson DW. Evidence-based guide to slowing the progression of early renal insufficiency. *Intern Med J*. 2004 Jan-Feb 2004;34(1-2):50-57.
6. Trivedi HS, Pang MM, Campbell A, Saab P. Slowing the progression of chronic renal failure: economic benefits and patients' perspectives. *Am J Kidney Dis*. Apr 2002;39(4):721-729.
7. Tonelli M, Bohm C, Pandeya S, Gill J, Levin A, Kiberd BA. Cardiac risk factors and the use of cardioprotective medications in patients with chronic renal insufficiency. *Am J Kidney Dis*. Mar 2001;37(3):484-489.
8. Stevens L, Cooper S, Singh R, Levin A. Detection of chronic kidney disease in non-nephrology practices An important focus for intervention. *BCM J*. July, August 2005;47(6):305-311.
9. Coresh J, Byrd-Holt D, Astor BC, et al. Chronic kidney disease awareness, prevalence, and trends among U.S. adults, 1999 to 2000. *J Am Soc Nephrol*. Jan 2005;16(1):180-188.
10. Drawz PE, Miller RT, Singh S, Watts B, Kern E. Impact of a chronic kidney disease registry and provider education on guideline adherence - a cluster randomized controlled trial. *BMC Med Inform Decis Mak*. Jul 2012;12(1):62.
11. Lenz O, Mekala DP, Patel DV, Fornoni A, Metz D, Roth D. Barriers to successful care for chronic kidney disease. *BMC Nephrol*. 2005;6:11.
12. Stevens PE, O'Donoghue DJ, de Lusignan S, et al. Chronic kidney disease management in the United Kingdom: NEOERICA project results. *Kidney Int*. Jul 2007;72(1):92-99.
13. de Lusignan S, Chan T, Stevens P, et al. Identifying patients with chronic kidney disease from general practice computer records. *Fam Pract*. Jun 2005;22(3):234-241.
14. White SL, Polkinghorne KR, Cass A, Shaw J, Atkins RC, Chadban SJ. Limited knowledge of kidney disease in a survey of AusDiab study participants. *Med J Aust*. Feb 2008;188(4):204-208.
15. Razavian M, Heeley EL, Perkovic V, et al. Cardiovascular risk management in chronic kidney disease in general practice (the AusHEART study). *Nephrol Dial Transplant*. Apr 2012;27(4):1396-1402.
16. Levey AS, Coresh J, Balk E, et al. National Kidney Foundation practice guidelines for chronic kidney disease: evaluation, classification, and stratification. *Ann Intern Med*. Jul 2003;139(2):137-147.
17. NICE guidelines [CG182]. *Chronic kidney disease in adults assessment and management*. London UK . July 2014. <https://www.nice.org.uk/guidance/cg182> last accessed July 15, 2016
18. Australia KH. *Chronic Kidney Disease (CKD) Management in General Practice (2nd edition)*. Melbourne, Australia 2012.

- 1 19. Levin A, Hemmelgarn B, Culleton B, et al. Guidelines for the management of chronic  
2 kidney disease. *CMAJ*. Nov 2008;179(11):1154-1162.
- 3 20. Kidney Disease Improving Global Outcomes (KDIGO). KDIGO 2012 Clinical Practice  
4 Guideline for the Evaluation and Management of Chronic Kidney Disease. *Kidney*  
5 *International Supplements*. 2013;3(1).
- 6 21. Ganz GMF. Guidelines for the management of chronic kidney disease: Rationale,  
7 development, and implementation. *BCMJ*. 2005;Vol. 47(No. 6 July, August):292-295.
- 8 22. 2016/17 General Medical Services (GMS) contract Quality and Outcomes Framework  
9 (QOF) United Kingdom. April 2016.  
10 [http://www.nhsemployers.org/~media/Employers/Documents/Primary%20care%20contr](http://www.nhsemployers.org/~media/Employers/Documents/Primary%20care%20contracts/QOF/2016-17/2016-17%20QOF%20guidance%20documents.pdf)  
11 [acts/QOF/2016-17/2016-17%20QOF%20guidance%20documents.pdf](http://www.nhsemployers.org/~media/Employers/Documents/Primary%20care%20contracts/QOF/2016-17/2016-17%20QOF%20guidance%20documents.pdf) last accessed July  
12 15, 2017.
- 13 23. Canadian Institute for Health Information (CIHI). *Pan-Canadian Primary Health Care*  
14 *Indicator Update*. Toronto: Canadian Institute for Health Information (CIHI);2012.
- 15 24. Brouwers MC, Kho ME, Browman GP, et al. AGREE II: advancing guideline  
16 development, reporting and evaluation in health care. *Cmaj*. Dec 2010;182(18):E839-  
17 842.
- 18 25. Spertus JA, Eagle KA, Krumholz HM, Mitchell KR, Normand SL. American College of  
19 Cardiology and American Heart Association methodology for the selection and creation  
20 of performance measures for quantifying the quality of cardiovascular care. *Circulation*.  
21 2005;111(13):1703-1712.
- 22 26. To T, Guttman A, Loughheed MD, et al. Evidence-based performance indicators of  
23 primary care for asthma: a modified RAND Appropriateness Method. *Int J Qual. Health*  
24 *Care*. 2010;22(6):476-485.
- 25 27. Tu K, Mitiku TF, Ivers NM, et al. Evaluation of Electronic Medical Record  
26 Administrative data Linked Database (EMRALD). *Am J Manag Care*. Jan  
27 2014;20(1):e15-21.
- 28 28. Tu K, Widdifield J, Young J, et al. Are family physicians comprehensively using  
29 electronic medical records such that the data can be used for secondary purposes? A  
30 Canadian perspective. *BMC Medical Informatics and Decision Making*. 2015;15.
- 31 29. Tu K, Manuel D, Lam K, Kavanagh D, Mitiku TF, Guo H. Diabetics can be identified in  
32 an electronic medical record using laboratory tests and prescriptions. *J Clin Epidemiol*.  
33 Apr 2011;64(4):431-435.
- 34 30. Ivers NM, Tu K, Francis J, et al. Feedback GAP: study protocol for a cluster-randomized  
35 trial of goal setting and action plans to increase the effectiveness of audit and feedback  
36 interventions in primary care. *Implement Sci*. 2010;5:98.
- 37 31. Tu K, Mitiku T, Guo H, Lee DS, Tu JV. Myocardial infarction and the validation of  
38 physician billing and hospitalization data using electronic medical records. *Chronic Dis*  
39 *Can*. Sep 2010;30(4):141-146.
- 40 32. Tu K, Mitiku T, Lee DS, Guo H, Tu JV. Validation of physician billing and  
41 hospitalization data to identify patients with ischemic heart disease using data from the  
42 Electronic Medical Record Administrative data Linked Database (EMRALD). *Can J*  
43 *Cardiol*. 2010 Aug-Sep 2010;26(7):e225-228.
- 44 33. Ivers N, Pylypenko B, Tu K. Identifying patients with ischemic heart disease in an  
45 electronic medical record. *J Prim Care Community Health*. Jan 2011;2(1):49-53.
- 46 34. Litvin CB, Ornstein SM. Quality Indicators for Primary Care: An Example for Chronic  
47 Kidney Disease. *J Ambulatory Care Manage*. 2014;37(2):171-178.
- 48 35. Fukuma S, Shimizu S, Niihata K, et al. Development of quality indicators for care of  
49 chronic kidney disease in the primary care setting using electronic health data: a RAND-  
50 modified Delphi method. *Clin Exp Nephrol*. 2016:10.

- 1  
2  
3  
4  
5  
6  
7  
8  
9  
10  
11  
12  
13  
14  
15  
16  
17  
18  
19  
20  
21  
22  
23  
24  
25  
26  
27  
28  
29  
30  
31  
32  
33  
34  
35  
36  
37  
38  
39  
40  
41  
42  
43  
44  
45  
46  
47  
48  
49  
50  
51  
52  
53  
54  
55  
56  
57  
58  
59  
60
36. Vest BM, York TRM, Sand J, Fox CH, Kahn LS. Chronic Kidney Disease Guideline Implementation in Primary Care: A Qualitative Report from the TRANSLATE CKD Study *JABFM*. 2015;28(5):8.
  37. Litvin CB, Nietert PJ, Wessell AM, Jenkins RG, Ornstein S. Recognition and Management of CKD in Primary Care. *Am J Kidney Dis*. 2011;57(4):2.
  38. Levey AS, Bosch JP, Lewis JB, Greene T, Rogers N, Roth D. A more accurate method to estimate glomerular filtration rate from serum creatinine: a new prediction equation. Modification of Diet in Renal Disease Study Group. *Ann Intern Med*. Mar 1999;130(6):461-470.
  39. Levey AS, Stevens LA, Schmid CH, et al. A new equation to estimate glomerular filtration rate. *Ann Intern Med*. May 2009;150(9):604-612.

Confidential

1  
2  
3  
4  
5  
6  
7  
8  
9  
10  
11  
12  
13  
14  
15  
16  
17  
18  
19  
20  
21  
22  
23  
24  
25  
26  
27  
28  
29  
30  
31  
32  
33  
34  
35  
36  
37  
38  
39  
40  
41  
42  
43  
44  
45  
46  
47  
48  
49  
50  
51  
52  
53  
54  
55  
56  
57  
58  
59  
60

**Figure 1: Modified Delphi Panel Process**

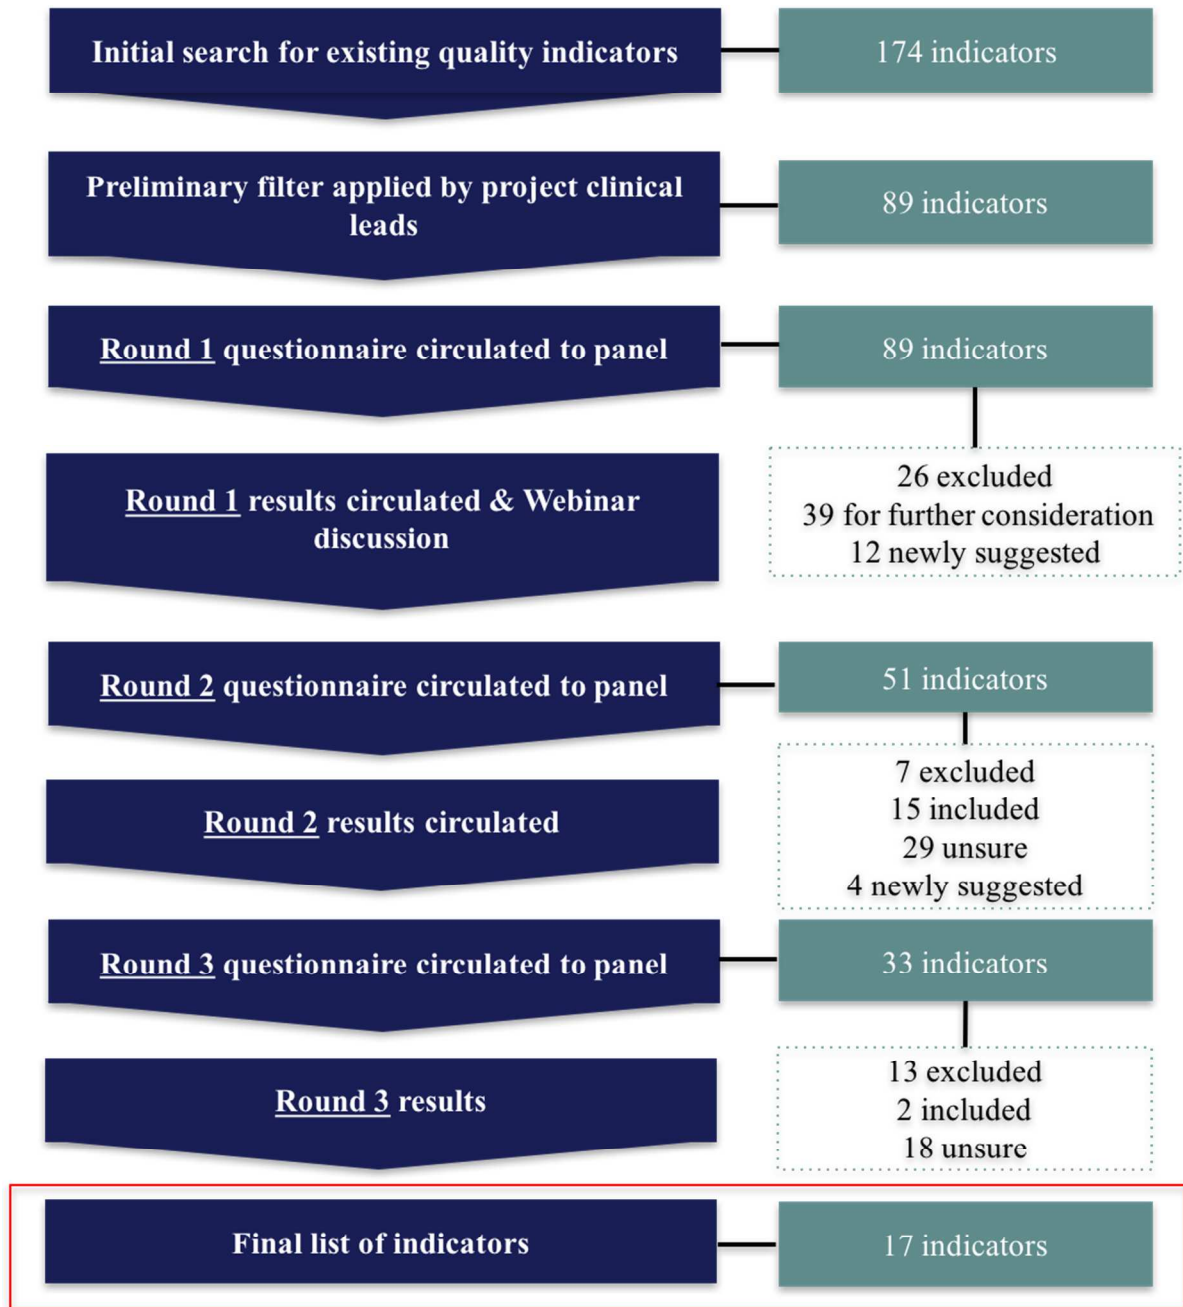

Figure 2. Indicator Rating Criteria Matrix

Indicator #: \_\_\_\_\_

Indicator: \_\_\_\_\_

Comments on Indicator:

Please rate this indicator in terms of the following statements, where 1 indicates that you *Definitely Disagree* with the statement and 9 indicates that you *Definitely Agree*. Please circle/select one number for each statement.

|                                                                                                                                       | Definitely Disagree | Uncertain/<br>Equivocal | Definitely Agree |
|---------------------------------------------------------------------------------------------------------------------------------------|---------------------|-------------------------|------------------|
| <b>1. Useful in Improving Patient Outcomes</b>                                                                                        |                     |                         |                  |
| <b>a. Evidence-based:</b> evidence supports a link between this indicator and positive patient outcomes.                              | 1                   | 2                       | 3                |
| <b>b. Interpretable:</b> the results of the measure are interpretable by practitioners.                                               | 1                   | 2                       | 3                |
| <b>c. Actionable:</b> the measure addresses an area that is under the practitioner's control.                                         | 1                   | 2                       | 3                |
| <b>d. Room for Improvement:</b> this indicator can detect current gaps in primary CKD care.                                           | 1                   | 2                       | 3                |
| <b>2. Measure Design</b>                                                                                                              |                     |                         |                  |
| <b>a. Validity:</b> the measure appears to measure what it is intended to.                                                            | 1                   | 2                       | 3                |
| <b>b. Reliability:</b> the measure is likely to be reproducible across organizations and delivery settings.                           | 1                   | 2                       | 3                |
| <b>3. Measure Implementation</b>                                                                                                      |                     |                         |                  |
| <b>a. Feasibility:</b> the data required for the indicator is likely to be obtained with reasonable effort at the primary care level. | 1                   | 2                       | 3                |
| <b>4. Overall Assessment</b>                                                                                                          |                     |                         |                  |
| <b>a. Overall:</b> overall this indicator has strong utility for CKD quality of care in primary care.                                 | 1                   | 2                       | 3                |

Overall Comments:

**Figure 3. Filter Criteria**

**Exclusion Criteria:**

- 75% or more of panel member ratings to the "overall" criteria fell within the bottom 2 tertiles (between 1 and 6 on 9-point Likert scale)

OR

- 75% or more of panel members' composite ratings (sum of ratings for all 7 sub- criteria) fell within the bottom 2 tertiles (7-48)

**Inclusion Criteria:**

- 75% or more of panel member ratings to the "overall" criteria fell within the top tertile (between 7 and 9 on 9-point Likert scale)

OR

- 75% or more of panel members' composite ratings (sum of ratings for all 7 sub- criteria) fell within the top tertile (49-63)

AND

- Median "overall" score 7 or greater

Confidential



**Table 1. Quality Indicators Resulting from Delphi Panel Process**

| <b>Prevalence, Incidence &amp; Mortality</b>   |                                                                                                                                                                                                            |
|------------------------------------------------|------------------------------------------------------------------------------------------------------------------------------------------------------------------------------------------------------------|
| 1.                                             | The primary care provider can identify patients in their practice aged 18 or over with CKD.                                                                                                                |
| <b>Screening, Diagnosis &amp; Risk Factors</b> |                                                                                                                                                                                                            |
| 2.                                             | Percentage of patients with an initial eGFR<60 mL/min/1.73 m <sup>2</sup> that are followed by a repeat test within six months.                                                                            |
| 3.                                             | Percentage of patients with an initial eGFR<60 mL/min/1.73 m <sup>2</sup> with an ACR conducted within six months.                                                                                         |
| 4.                                             | Percentage of patients with risk factors for CKD (diabetes and/or hypertension) with an eGFR in the past 18 months.                                                                                        |
| 5.                                             | Percentage of patients with risk factors for CKD (diabetes and/or hypertension) with an ACR in the past 18 months.                                                                                         |
| <b>Management</b>                              |                                                                                                                                                                                                            |
| 6.                                             | Percentage of patients with CKD with an eGFR in the past 18 months.                                                                                                                                        |
| 7.                                             | Percentage of patients with CKD with an ACR in the past 18 months.                                                                                                                                         |
| 8.                                             | Percentage of patients with CKD with a BP recorded in the past 18 months.                                                                                                                                  |
| 9.                                             | Percentage of patients with diabetes and albuminuria (moderately or severely increased ACR ≥3 mg/mmol) with a BP recorded in the past nine months.                                                         |
| 10.                                            | Percentage of patients with CKD with a most recent BP<140/90 mmHg, or with CKD and diabetes with a most recent BP<130/80mmHg.                                                                              |
| 11.                                            | Percentage of patients with diabetes and albuminuria (moderately or severely increased ACR ≥3 mg/mmol) who were prescribed an ACE inhibitor or ARB unless a contraindication or side effects are recorded. |
| 12.                                            | Percentage of patients with CKD that had a serum potassium test 7-30 days after initial ACE inhibitor/ARB prescription.                                                                                    |
| 13.                                            | Percentage of patients with CKD simultaneously receiving both an ACE inhibitor and an ARB.                                                                                                                 |
| 14.                                            | Percentage of patients with stage 3-5 CKD and a prescription for a NSAID longer than two weeks.                                                                                                            |
| 15.                                            | Percentage of patients ≥ 50 and ≤ 80 years of age with stage 3-5 CKD on a statin unless contraindicated.                                                                                                   |
| 16.                                            | Percentage of patients with CKD with an influenza vaccine in the past year unless contraindicated.                                                                                                         |
| <b>Referral to a Specialist</b>                |                                                                                                                                                                                                            |
| 17.                                            | Percentage of patients age <80 years with a referral to a Nephrologist for eGFR<30 mL/min/1.73 m <sup>2</sup> .                                                                                            |

**Acronyms**

|       |                                      |
|-------|--------------------------------------|
| ACE   | Angiotensin Converting Enzyme        |
| ACR   | Albumin to Creatinine Ratio          |
| ARB   | Angiotensin II Receptor Blocker      |
| BP    | Blood Pressure                       |
| CKD   | Chronic Kidney Disease               |
| eGFR  | Estimated Glomerular Filtration Rate |
| NSAID | Non-Steroidal Anti-Inflammatory Drug |

Table 2. Results as Applied in Electronic Medical Record Administrative data Linked Database

| Quality Indicator                                                                                                                                                                                              | Numerator | Denominator | Percent |
|----------------------------------------------------------------------------------------------------------------------------------------------------------------------------------------------------------------|-----------|-------------|---------|
| <b>Prevalence, Incidence &amp; Mortality</b>                                                                                                                                                                   |           |             |         |
| 1. Patients with stage 3+CKD that have it documented in their cumulative patient profile.*                                                                                                                     | 1856      | 6848        | 27.1%   |
| <b>Screening, Diagnosis &amp; Risk Factors</b>                                                                                                                                                                 |           |             |         |
| 2. Percentage of patients with an initial eGFR<60 mL/min/1.73 m <sup>2</sup> with an eGFR in the +/- 6 months.*                                                                                                | 4068      | 8573        | 47.5%   |
| 3. Percentage of patients with an initial† eGFR<60 mL/min/1.73 m <sup>2</sup> with an ACR in the +/- 6 months.*                                                                                                | 1400      | 8573        | 16.3%   |
| 4. Percentage of patients with risk factors for CKD (diabetes and/or hypertension) with an eGFR in the past 18 months.                                                                                         | 23998     | 32637       | 73.5%   |
| 5. Percentage of patients with risk factors for CKD (diabetes and/or hypertension) with an ACR in the past 18 months.                                                                                          | 9291      | 32637       | 28.5%   |
| <b>Management</b>                                                                                                                                                                                              |           |             |         |
| 6. Percentage of patients with CKD with an eGFR in the past 18 months.                                                                                                                                         | 6190      | 6848        | 90.4%   |
| 7. Percentage of patients with CKD with an ACR in the past 18 months.                                                                                                                                          | 2341      | 6848        | 34.2%   |
| 8. Percentage of patients with CKD with a BP recorded in the past nine months.                                                                                                                                 | 5692      | 6848        | 83.1%   |
| 9. Percentage of patients with diabetes and albuminuria (moderately or severely increased ACR ≥3 mg/mmol) with a BP recorded in the past nine months.                                                          | 5439      | 6320        | 86.1%   |
| 10. Percentage of patients with CKD with a most recent BP<140/90 mmHg, or with CKD and diabetes with a most recent BP <130/80 mmHg.                                                                            | 4465      | 6848        | 65.2%   |
| 11. Percentage of patients with diabetes and albuminuria (moderately or severely increased ACR ≥3 mg/mmol) who were prescribed an ACE inhibitor or ARB unless a contraindication or side effects are recorded. | 3734      | 4997        | 74.7%   |
| 12. Percentage of Patients with CKD that had a serum potassium test 7-30 days after initial ACE inhibitor/ARB prescription.*                                                                                   | 2944      | 4965        | 59.3%   |
| 13. Percentage of patients with CKD with an ACE inhibitor and an ARB prescription on the same day.*                                                                                                            | 48        | 6848        | 0.7%    |
| 14. Percentage of patients with CKD and ≥ one prescription for a NSAID.*                                                                                                                                       | 99        | 6848        | 1.4%    |
| 15. Percentage of patients ≥ 50 and ≤ 80 years of age with CKD on a statin unless contraindicated.                                                                                                             | 2236      | 3701        | 60.4%   |
| 16. Percentage of patents with CKD with an influenza vaccine in the past year unless contraindicated.                                                                                                          | 4493      | 6848        | 65.6%   |
| <b>Referral to a Specialist</b>                                                                                                                                                                                |           |             |         |
| 17. Percentage of patients age <80 years with a referral to a Nephrologist for eGFR<30 mL/min/1.73m <sup>2</sup> .                                                                                             | 339       | 508         | 66.7%   |

1 \*modified to be feasible to measure

2 †first eGFR < 60 mL/min/1.73 m<sup>2</sup> at least 6 months prior to the EMR load date

3  
4 **Acronyms**

5 ACE            Angiotensin Converting Enzyme  
6 ACR            Albumin to Creatinine Ratio  
7 ARB            Angiotensin Receptor Blocker  
8 BP             Blood Pressure  
9 CKD            Chronic Kidney Disease  
10 eGFR           Estimated Glomerular Filtration Rate  
11 NSAID          Non-Steroidal Anti-Inflammatory Drug  
12  
13  
14  
15  
16  
17  
18  
19  
20  
21  
22  
23  
24  
25  
26  
27  
28  
29  
30  
31  
32  
33  
34  
35  
36  
37  
38  
39  
40  
41  
42  
43  
44  
45  
46  
47  
48  
49  
50  
51  
52  
53  
54  
55  
56  
57  
58  
59  
60

Confidential

## Appendix A. Methodology for Identifying Preliminary Indicators and Supporting Evidence for Chronic Kidney Disease in Primary Care

### 1. Overview

The purpose of this search was to identify relevant quality indicators for chronic kidney disease in primary care, and to identify high quality clinical evidence to support these indicators. This involved a two-step approach designed to identify:

1. Existing quality indicators which have been established and measured by other organizations
2. Relevant recommendations from high quality clinical practice guidelines

This material was used to develop the preliminary list of indicators presented to the Delphi panel for their input and consideration.

### 2. Indicator Search Strategy

A multi-faceted approach was used to identify Canadian and international organizations that developed, recommended, or implemented performance indicators in primary care in both the grey literature and indexed, peer-reviewed literature.

This process included:

- a. Developing a list of websites for relevant organizations that develop or report on indicators, and searching each website individually
- b. Conducting a focused Internet search using Google to locate additional organizations relevant to each topic area, and examining their material to identify additional indicators
- c. Conducting a focused search using Ovid MEDLINE to identify any relevant indicators in the indexed literature
- d. Review of additional material provided by experts and clinical leads

#### 2.1 Limits and Inclusion Criteria

- The search was limited to English language indicators published in the past 5 years (between November 2008 and December 2013).
- A number of large groups have published reports on indicators, but the data definitions and specific measures were pulled from other sources. Despite some duplication, these results were included at the first stage in order to provide an overview of the general adoption of specific indicators.
- Only published indicators from the most recent source available were included. For example, if information was collected in both 2009 and 2012, only the 2012 indicator was included.
- The search was focused on identifying indicators for chronic kidney disease in primary care. For this reason, indicators which focused only on patients with stage 4 or 5 CKD, end stage renal disease or who are receiving renal replacement therapy, self-reported measures/patient awareness indicators, and measures not specific to CKD (e.g. overall incidence of diabetes) were excluded.

- Indicators that groups reported that they considered, but ultimately discarded, were excluded. For example, if a paper reported a rigorous process to select what they considered to be key indicators, their rejected indicators were not included in our results.

## 2.2 Search of the Grey Literature for Indicators: List of Relevant Websites Examined

- Agency for Healthcare Research and Quality: <http://www.ahrq.gov>
- Agency for Healthcare Research and Quality – Quality Indicators: <http://www.qualityindicators.ahrq.gov/default.aspx>
- Alberta AIM: [www.albertaaim.ca](http://www.albertaaim.ca)
- Alberta Health Services: <http://www.albertahealthservices.ca>
- Alberta Interactive Health Data Application: [http://www.ahw.gov.ab.ca/IHDA\\_Retrieval/selectCategory.do](http://www.ahw.gov.ab.ca/IHDA_Retrieval/selectCategory.do)
- American Medical Association 2013 Physician Quality Reporting System: <http://www.ama-assn.org/apps/listserv/x-check/qmeasure.cgi?submit=PQRS%20group>
- Australian Commission for Safety and Quality in Health Care: [www.safetyandquality.gov.au/](http://www.safetyandquality.gov.au/)
- Australian Institute of Health and Welfare: <http://www.aihw.gov.au/>
- Australian National Health Performance Framework: <http://meteor.aihw.gov.au/content/index.phtml/itemId/392569>
- British Columbia Patient Safety and Quality Council: <http://www.bcpsqc.ca/>
- Canada Health Infoway: <http://www.infoway-inforoute.ca/lang-en/>
- Canadian Agency for Drugs and Technologies in Health: <http://www.cadth.ca/index.php/en/home>
- Canadian Foundation for Healthcare Improvement: <http://www.cfhi-fcass.ca>
- Canadian Institute for Health Information: [www.cihi.ca](http://www.cihi.ca)
- Canadian Medical Association: <http://www.cma.ca/>
- Canadian Society of Nephrology: <http://www.gain-ni.org/images/Uploads/Guidelines/Chronic%20Kidney%20Disease.pdf>
- Centers for Disease Control and Prevention Chronic Kidney Disease Surveillance System: <http://apps.nccd.cdc.gov/CKD/default.aspx>
- Centers for Disease Control and Prevention: [www.cdc.gov/DataStatistics/](http://www.cdc.gov/DataStatistics/)
- Centre for Health Services and Policy Research, The University of British Columbia: <http://www.chspr.ubc.ca/>
- Clinical Excellence Commission: <http://www.cec.health.nsw.gov.au/>
- The Commonwealth Fund: <http://www.commonwealthfund.org/>
- European Community Health Indicators: [http://ec.europa.eu/health/indicators/echi/list/index\\_en.htm](http://ec.europa.eu/health/indicators/echi/list/index_en.htm)
- French National Authority for Health: [www.has-sante.fr/portail/jcms/c\\_5443/english?pcid=c\\_5443](http://www.has-sante.fr/portail/jcms/c_5443/english?pcid=c_5443)
- Government of Saskatchewan, Ministry of Health: [www.health.gov.sk.ca](http://www.health.gov.sk.ca)
- Health Canada: <http://www.hc-sc.gc.ca/index-eng.php>
- Health Council of Canada: <http://www.healthcouncilcanada.ca/>

- 1 • Health Council of the Netherlands: [www.gezondheidsraad.nl/en](http://www.gezondheidsraad.nl/en)
- 2 • Health Indicators Warehouse: <http://healthindicators.gov/>
- 3 • Health Quality Council of Alberta: <http://www.hqca.ca/index.php?id=%20229>
- 4 • Health Quality Ontario: <http://www.hqontario.ca/>
- 5 • The Information System of the Federal Health Monitoring: [http://www.gbe-](http://www.gbe-bund.de/gbe10/pkg_isgbe5.prc_isgbe?p_uid=gastd&p_aid=53878946&p_sprache=E)
- 6 • Institute for Clinical Evaluative Sciences: <http://www.ices.on.ca/>
- 7 • International Society for Quality in Health Care: <http://www.isqua.org/>
- 8 • Manitoba Centre for Health Policy: <http://umanitoba.ca/medicine/units/mchp/>
- 9 • Manitoba Health: <http://www.gov.mb.ca/health/index.html>
- 10 • Manitoba's Physician Integrated Network Quality Measurement: <http://www.gov.mb.ca/health/primarycare/pin/qm.html>
- 11 • Ministry of Health and Long Term Care: <http://www.health.gov.on.ca/en/>
- 12 • National Health Service Atlas of Variation in Healthcare for People with Kidney Disease: <http://www.rightcare.nhs.uk/index.php/atlas/kidneycare>
- 13 • National Health Service Outcomes Framework: <http://www.hscic.gov.uk/nhsf>
- 14 • National Health Service Quality Improvement Scotland: [http://www.nhshealthquality.org/nhsqis/CCC\\_FirstPage.jsp](http://www.nhshealthquality.org/nhsqis/CCC_FirstPage.jsp)
- 15 • National Centre for Health Outcomes Development: <http://www.nchod.nhs.uk/>
- 16 • National Committee for Quality Assurance: <http://www.ncqa.org/>
- 17 • National Institute for Health and Clinical Excellence: <http://www.nice.org.uk/>
- 18 • National Institute for Health Research: <http://www.nihr.ac.uk/>
- 19 • National Kidney Foundation Kidney Disease Outcomes Quality Initiative: <http://www.kidney.org/professionals/KDOQI/>
- 20 • National Quality Forum: <http://www.qualityforum.org/Home.aspx>
- 21 • National Quality Measures Clearinghouse: <http://www.qualitymeasures.ahrq.gov/>
- 22 • New Brunswick Health Council: <http://www.nbhc.ca/>
- 23 • New Zealand Ministry of Health: <http://www.moh.govt.nz/moh.nsf>
- 24 • Newfoundland and Labrador Department of Health and Community Services: <http://www.health.gov.nl.ca/health/>
- 25 • National Institute for Health and Clinical Excellence Chronic Kidney Disease Quality Standard: <http://publications.nice.org.uk/chronic-kidney-disease-quality-standard-qs5/list-of-statements>
- 26 • National Institute for Health and Clinical Excellence Clinical Commissioning Group Outcomes Indicator Set (formerly known as the 'Commissioning Outcomes Framework' or 'COF'): <http://www.nice.org.uk/aboutnice/ccgois/CCGOIS.jsp>
- 27 • National Institute for Health and Clinical Excellence Quality Standards: <http://guidance.nice.org.uk/qualitystandards/qualitystandards.jsp>
- 28 • Northwest Territories Department of Health and Social Services: <http://www.hlthss.gov.nt.ca/>
- 29 • Nova Scotia Department of Health: <http://www.gov.ns.ca/health/>

- 1 • Nuffield Trust for Research and Policy Studies in Health Services:  
2 <http://www.nuffieldtrust.org.uk/>
- 3 • Nunavut Health and Social Services: <http://www.gov.nu.ca/health/>
- 4 • Organization for Economic Co-operation and Development Health Care Quality  
5 Indicators Project: [http://www.oecd.org/health/health-  
7 systems/healthcarequalityindicators.htm](http://www.oecd.org/health/health-<br/>6 systems/healthcarequalityindicators.htm)
- 8 • Ontario Renal Network: <http://www.renalnetwork.on.ca/>
- 9 • Organization for Economic Co-Operation and Development:  
10 [http://www.oecd.org/home/0,3305,en\\_2649\\_201185\\_1\\_1\\_1\\_1\\_1,00.html](http://www.oecd.org/home/0,3305,en_2649_201185_1_1_1_1_1,00.html)
- 11 • Prince Edward Island Department of Health and Wellness:  
12 <http://www.gov.pe.ca/health/index.php3>
- 13 • Pan American Health Association: <http://new.paho.org/>
- 14 • Public Health Agency of Canada Canadian Best Practices Portal Health Indicators:  
15 <http://cbpp-pcpe.phac-aspc.gc.ca/resources/health-indicators/>
- 16 • Public Health England Health Profiles Indicator Guide:  
17 <http://www.apho.org.uk/resource/item.aspx?RID=127372>
- 18 • Québec Ministère de la Santé et des Services Sociaux:  
19 <http://www.msss.gouv.qc.ca/en/index.php>
- 20 • The RAND Corporation: <http://www.rand.org/>
- 21 • Royal College of Physicians and Surgeons of Canada: <http://rcpsc.medical.org/>
- 22 • Royal College of Physicians London: <http://www.rcplondon.ac.uk/Pages/index.aspx>
- 23 • Saskatchewan Health Quality Council: [www.hqc.sk.ca](http://www.hqc.sk.ca)
- 24 • Statistics Canada: <http://www.statcan.gc.ca/>
- 25 • United States Department of Health and Human Services Measure Inventory:  
26 <http://www.qualitymeasures.ahrq.gov/hhs/inventory.aspx#browseType=current>
- 27 • United States Renal Data System Annual Data Report: <http://www.usrds.org/adr.aspx>
- 28 • United Kingdom Quality and Outcomes Framework:  
29 <http://www.nice.org.uk/aboutnice/qof/qof.jsp>
- 30 • United States Renal Data System: <http://www.usrds.org/>
- 31 • World Health Organization: <http://www.who.int/en/>
- 32 • World Health Organization Statistical Information System:  
33 [www.who.int/whosis/indicators/en/](http://www.who.int/whosis/indicators/en/)
- 34 • Yukon Health and Social Services: <http://www.hss.gov.yk.ca>

### 2.3 Search of the Grey Literature for Indicators: Supplemental Internet Search

35 General Google search: (indicator\* OR measure\* OR quality measure) and (chronic kidney  
36 disease or CKD). The first three pages of results were examined for each search except for  
37 searches combining the term “chronic kidney disease” which returned more relevant results, so  
38 the review was expanded to include the first five pages of results.

### 2.4 Search of Indexed Literature for Indicators: Ovid MEDLINE Search

39 <1996 to November Week 3 2013>

40 1 Quality of Health Care/ or Quality Assurance, Health Care/ or Total Quality Management/  
41 or Health Status Indicators/ or Quality Indicators, Health Care/ or "Outcome and Process  
42

1 Assessment (Health Care)"/ or "Outcome Assessment (Health Care)"/ or "Process Assessment  
 2 (Health Care)"/ (150619)  
 3  
 4 2 (indicator\$ or (quality adj assess\$) or (quality adj care) or (logic adj model\$) or (health adj  
 5 improve\$) or (quality adj metric\$) or (quality adj measur\$) or (quality adj improvem\$) or  
 6 (quality adj report\$) or (assessment adj criteria) or (care adj evaluat\$) or framework or  
 7 (performance adj measure\$) or (system\$ adj performance)).ab,ti. (218826)  
 8  
 9 3 renal insufficiency, chronic/ or kidney failure, chronic/ or ("kidney disease\$" or "renal  
 10 disease\$" or CKD).mp. (98743)  
 11 4 1 and 2 and 3 (304)  
 12 5 limit 4 to (english language and yr="2008 -Current") (129)

13 Notes regarding search terminology:

- 14 • Capitalized terms followed by a / indicate MeSH terms
- 15 • .m\_titl indicates that the terms are being searched in the title field
- 16 • .mp indicates that the terms are being searched in multiple fields, including the title,  
 17 abstract or MeSH field
- 18 • \$ is a “wildcard” that allows for truncation (eg. improve\$ will return results for  
 19 improvement, improves, etc.)
- 20 • adj indicates that two terms need to be adjacent to each another, in either direction. (eg.  
 21 quality adj assess\$ will return results for ‘quality assessment’ and ‘assessing quality’,  
 22 etc.)
- 23
- 24
- 25
- 26
- 27
- 28

### 29 3. Selecting and Compiling Preliminary Indicator List

30 174 existing quality indicators were identified using the search strategy outlined above. These  
 31 indicators were reviewed by two clinical leads (GN, KT) who identified where indicators were  
 32 similar enough that they could be combined. Original phrasing was maintained where possible,  
 33 and if multiple quality indicators were similar enough to be combined into one, the indicator with  
 34 the most specific details was the one which was preserved. When indicators were combined, all  
 35 references supporting the measure were maintained to show that multiple organizations  
 36 considered it an important measure of quality. For example, the indicators “Proportion of CKD  
 37 patients with a formal assessment of cardiovascular risk factors documented in their records  
 38 during the past year” and “Proportion of people with CKD who are assessed for cardiovascular  
 39 risk” were combined into one indicator, maintaining the wording of the first, while providing the  
 40 references for both.

41 If there was agreement between both clinical leads that an indicator was out of scope, then it was  
 42 removed from the list. If only one clinical lead suggested an indicator be removed, it was still  
 43 maintained at this stage. None of the indicators were modified at this stage to make them more  
 44 feasible to measure in an EMR, as it was agreed by the project team that this would happen at a  
 45 later step in the process if necessary.

46 This first review by the clinical leads to combine duplicate measures, and to exclude indicators  
 47 which both agreed were out of scope, resulted in the list being focused to 102 quality indicators.  
 48

### 53 4. Clinical Evidence Search Strategy

54 A focused search strategy was designed that concentrated on quickly identifying high quality  
 55 clinical practice guidelines by searching the following resources:

#### 56 4.1 Guideline Repositories:

- 57 • National Guideline Clearinghouse: [www.guideline.gov/](http://www.guideline.gov/)



- Canadian Medical Association Clinical Practice Guideline Infobase:  
<http://mdm.ca/cpgsnew/cpgs/index.asp>

#### 4.2 Renowned Developers with Proven Methodologies:<sup>1</sup>

- United States Preventive Services Task Force: [www.uspreventiveservicestaskforce.org/](http://www.uspreventiveservicestaskforce.org/)
- Scottish Intercollegiate Guidelines Network: [www.sign.ac.uk/guidelines/index.html](http://www.sign.ac.uk/guidelines/index.html)
- New Zealand Guidelines Group: [www.nzgg.org.nz](http://www.nzgg.org.nz)
- Institute for Clinical Systems Improvement: [www.icsi.org/](http://www.icsi.org/)

#### 4.3 Supplemental Internet Search:

- Relevant Canadian and international organizations in the area:
  - Canadian Society of Nephrology: [www.csnsn.ca/](http://www.csnsn.ca/)
  - International Society of Nephrology: [www.csnsn.ca/](http://www.csnsn.ca/)
  - The Renal Association: [www.renal.org](http://www.renal.org)
  - The Kidney Foundation of Canada [www.kidney.ca](http://www.kidney.ca)
  - National Kidney Foundation [www.kidney.org](http://www.kidney.org)
  - Kidney Disease Improving Global Outcomes [www.kdigo.org](http://www.kdigo.org)
  - British Renal Society [www.britishrenal.org](http://www.britishrenal.org)
  - Renal Society of Australasia [www.renalsociety.org](http://www.renalsociety.org)
  - European Renal Association [www.era-edta.org](http://www.era-edta.org)
  - American Society of Nephrology [www.asn-online.org](http://www.asn-online.org)
  - Ontario Renal Network [www.renalnetwork.on.ca](http://www.renalnetwork.on.ca)
  - British Columbia Renal Agency [www.bcrenalagency.org](http://www.bcrenalagency.org)
- Search for additional guidelines using Google: (“kidney” or “renal”) and “guideline(s)”, the first five pages of results were examined.

All results were limited to English language resources published in the past five years (between November 2008 and December 2013).

Results identified in this manner were evaluated using criteria from the Rigour of Development domain of the AGREE II Instrument,<sup>24</sup> a validated instrument for assessing the quality of clinical practice guidelines. This ensures that relevant evidence was considered during guideline development, and that the recommendations in the guideline are linked directly to levels of evidence. Guidelines which were identified that satisfied these criteria were then reviewed using the AGREE II Instrument, and the most methodologically sound guidelines which addressed the full scope of CKD care in primary care were selected to form the evidence base supporting the indicators.

---

<sup>1</sup>Note: Guidelines published by these key developers are also indexed in the National Guideline Clearinghouse, but there is a delay between publishing and indexing. This search strategy is designed to ensure that guidelines from these reputable developers are considered.

## Appendix B. Original List of Indicators for Chronic Kidney Disease Identified in the Literature Search

| #                                                  | Indicator                                                                                                                                                                                                                   |
|----------------------------------------------------|-----------------------------------------------------------------------------------------------------------------------------------------------------------------------------------------------------------------------------|
| <b>1.0 Prevalence &amp; Incidence</b>              |                                                                                                                                                                                                                             |
| 1                                                  | The contractor can identify patients aged 18 or over with CKD [10, 11].                                                                                                                                                     |
| 2                                                  | Diagnosis of stages 1–5 CKD [2, 3, 8, 19] (e.g. age, gender).                                                                                                                                                               |
| 3                                                  | Diagnosis of CKD by comorbidity [2, 8] (e.g. subgroups can be listed in the notes: diabetes, hypertension, CV disease) [8].                                                                                                 |
| 4                                                  | Incidence of stages 1–5 CKD by eGFR (kidney function) and by demographics and risk factor categories (diabetes, hypertension, cardiovascular disease, obesity, age, and gender) [2, 19].                                    |
| 5                                                  | Prevalence of overall CKD, and prevalence by demographics and risk factor categories (diabetes, hypertension, cardiovascular disease, obesity (BMI $\geq 30$ )), and by CKD stage (eGFR $< 60$ and ACR $\geq 30$ ) [8, 19]. |
| 6                                                  | CKD patients (all CKD, CKD patients eGFR $< 60$ , and CKD patients ACR $\geq 30$ ) with glycohemoglobin $< 7\%$ [8].                                                                                                        |
| 7                                                  | Proportion of CKD patients moving stage over time [2].                                                                                                                                                                      |
| 8                                                  | Proportion of CKD patients moving to ESRD over time [2].                                                                                                                                                                    |
| 9                                                  | Progression of CKD by demographic characteristics [2].                                                                                                                                                                      |
| 10                                                 | Progression of decreased renal function by level of proteinuria [2].                                                                                                                                                        |
| <b>1.1 Mortality</b>                               |                                                                                                                                                                                                                             |
| 11                                                 | All-cause mortality rates [2].                                                                                                                                                                                              |
| 12                                                 | All-cause mortality by eGFR and albuminuria [19].                                                                                                                                                                           |
| 13                                                 | All cause mortality rates by eGFR category/stage [19].                                                                                                                                                                      |
| <b>2.0 Screening, Diagnosis &amp; Risk Factors</b> |                                                                                                                                                                                                                             |
| 14                                                 | Proportion of patients (without CKD diagnosis) with eGFR $< 60$ where there is evidence of a repeat creatinine test and a proteinuria test within 3 months (or 6 months) [21].                                              |
| 15                                                 | Proportion of initial abnormal estimated GFR results that are followed by a repeat test within 2 weeks and a further test at 90 days (where appropriate) [14].                                                              |
| 16                                                 | Proportion of patients screened for CKD who have had (a) an assessment of estimated GFR, (b) urinalysis, (c) both an assessment of estimated GFR and urinalysis [14].                                                       |
| 17                                                 | Proportion of patients with CKD stage 3 or worse in whom the diagnosis has been confirmed by two estimated GFR readings, at least 90 days apart [14].                                                                       |
| 18                                                 | Proportion of patients with a diagnosis of microalbuminuria in whom the diagnosis has been confirmed with at least 2 abnormal results [14].                                                                                 |
| 19                                                 | Prevalence of NSAID use among persons with and without CKD in the general population [19].                                                                                                                                  |
| 20                                                 | Proportion of CKD patients with a formal assessment of cardiovascular risk factors documented in their records during the past year [7, 14].                                                                                |
| 21                                                 | Percentage of physicians reporting the perceived risk factors that increased CKD risk [19].                                                                                                                                 |
| <b>3.0 Management</b>                              |                                                                                                                                                                                                                             |
| 22                                                 | Proportion of patients with a confirmed diagnosis of CKD in whom the rate of change in GFR has been evaluated with at least 3 assessments of GFR over not less than 90 days [14].                                           |

|                                                      |                                                                                                                                                                                             |
|------------------------------------------------------|---------------------------------------------------------------------------------------------------------------------------------------------------------------------------------------------|
| 23                                                   | Proportion of patients with CKD with regular monitoring of the estimated GFR at the frequency recommended by NICE or local guidelines [14].                                                 |
| 24                                                   | Measurement of eGFR every 6 months in patients with Stage 3 CKD [20].                                                                                                                       |
| 25                                                   | Proportion of CKD patients with eGFR< 30ml/min with an annual Hb level [14].                                                                                                                |
| 26                                                   | Complete blood count measured annually for all patients with Stage 3b-5 CKD (eGFR<45) [20].                                                                                                 |
| 27                                                   | Percent of persons 65 years of age and over with CKD who receive medical evaluation with serum creatinine, lipids, and microalbuminuria [4].                                                |
| 28                                                   | Proportion of CKD patients who have serum creatinine and urine protein tests at least annually [21].                                                                                        |
| 29                                                   | Proportion of CKD patients who had a serum creatinine test prior to and 7-10 days after initial ACEI/ARB prescription. [21].                                                                |
| 30                                                   | Proportion of CKD patients who had a serum potassium test 7-14 days after initial ACEI or ARB prescription [21].                                                                            |
| 31                                                   | Proportion of CKD patients who were prescribed an ACEI or ARB [21].                                                                                                                         |
| 32                                                   | Percentage patients 18 and older with CKD who have had a urine albumin:creatinine ratio (or protein:creatinine ratio) test in the preceding 12 months [11].                                 |
| 33                                                   | Percentage patients 18 and older with CKD who have a record of an albumin: creatinine ratio (or protein: creatinine ratio) value in the previous 15 months [11].                            |
| 34                                                   | Probability of urine albumin, creatinine testing or both in patients at risk for CKD, by risk factor (diabetes, and hypertension) [2, 7, 14, 18].                                           |
| 35                                                   | Proportion of patients with CKD who have had a measurement of proteinuria within the previous 12 months [14, 15].                                                                           |
| 36                                                   | Proportion of patients with proteinuria equivalent to <0.5 g/day in whom the result has been confirmed with a repeat test performed on an early morning urine specimen [14].                |
| 37                                                   | Proportion of CKD patients and proteinuria who achieve a decrease in proteinuria to <0.5 g/day [14].                                                                                        |
| 38                                                   | Percentage of physicians reporting that clinical guidelines influence their treatment of CKD [19].                                                                                          |
| 39                                                   | Percentage of patients with assessment of cognitive function among adults with CKD by kidney function [19].                                                                                 |
| 40                                                   | Avoidance of non-steroidal anti-inflammatory drugs or COX-2 inhibitors in patients with Stage 3-5 CKD [20].                                                                                 |
| 41                                                   | Proportion of people with CKD who have a current agreed care plan appropriate to the stage and rate of progression of CKD [7 ].                                                             |
| 42                                                   | Evidence of local arrangements to ensure that people with CKD who become acutely unwell have their medication reviewed, and receive an assessment of volume status and renal function [7 ]. |
| <b>3.1 Hypertension &amp; Chronic Kidney Disease</b> |                                                                                                                                                                                             |
| 43                                                   | Blood pressure recorded in six months for patients with CKD [20].                                                                                                                           |

|                                                  |                                                                                                                                                                                                                                                                                                                                                                                                                                                                                                                              |
|--------------------------------------------------|------------------------------------------------------------------------------------------------------------------------------------------------------------------------------------------------------------------------------------------------------------------------------------------------------------------------------------------------------------------------------------------------------------------------------------------------------------------------------------------------------------------------------|
| 1                                                |                                                                                                                                                                                                                                                                                                                                                                                                                                                                                                                              |
| 2                                                |                                                                                                                                                                                                                                                                                                                                                                                                                                                                                                                              |
| 3                                                |                                                                                                                                                                                                                                                                                                                                                                                                                                                                                                                              |
| 4                                                |                                                                                                                                                                                                                                                                                                                                                                                                                                                                                                                              |
| 5                                                |                                                                                                                                                                                                                                                                                                                                                                                                                                                                                                                              |
| 6                                                |                                                                                                                                                                                                                                                                                                                                                                                                                                                                                                                              |
| 7                                                |                                                                                                                                                                                                                                                                                                                                                                                                                                                                                                                              |
| 8                                                |                                                                                                                                                                                                                                                                                                                                                                                                                                                                                                                              |
| 9                                                |                                                                                                                                                                                                                                                                                                                                                                                                                                                                                                                              |
| 10                                               |                                                                                                                                                                                                                                                                                                                                                                                                                                                                                                                              |
| 11                                               |                                                                                                                                                                                                                                                                                                                                                                                                                                                                                                                              |
| 12                                               |                                                                                                                                                                                                                                                                                                                                                                                                                                                                                                                              |
| 13                                               |                                                                                                                                                                                                                                                                                                                                                                                                                                                                                                                              |
| 14                                               |                                                                                                                                                                                                                                                                                                                                                                                                                                                                                                                              |
| 15                                               |                                                                                                                                                                                                                                                                                                                                                                                                                                                                                                                              |
| 16                                               |                                                                                                                                                                                                                                                                                                                                                                                                                                                                                                                              |
| 17                                               |                                                                                                                                                                                                                                                                                                                                                                                                                                                                                                                              |
| 18                                               |                                                                                                                                                                                                                                                                                                                                                                                                                                                                                                                              |
| 19                                               |                                                                                                                                                                                                                                                                                                                                                                                                                                                                                                                              |
| 20                                               |                                                                                                                                                                                                                                                                                                                                                                                                                                                                                                                              |
| 21                                               |                                                                                                                                                                                                                                                                                                                                                                                                                                                                                                                              |
| 22                                               |                                                                                                                                                                                                                                                                                                                                                                                                                                                                                                                              |
| 23                                               |                                                                                                                                                                                                                                                                                                                                                                                                                                                                                                                              |
| 24                                               |                                                                                                                                                                                                                                                                                                                                                                                                                                                                                                                              |
| 25                                               |                                                                                                                                                                                                                                                                                                                                                                                                                                                                                                                              |
| 26                                               |                                                                                                                                                                                                                                                                                                                                                                                                                                                                                                                              |
| 27                                               |                                                                                                                                                                                                                                                                                                                                                                                                                                                                                                                              |
| 28                                               |                                                                                                                                                                                                                                                                                                                                                                                                                                                                                                                              |
| 29                                               |                                                                                                                                                                                                                                                                                                                                                                                                                                                                                                                              |
| 30                                               |                                                                                                                                                                                                                                                                                                                                                                                                                                                                                                                              |
| 31                                               |                                                                                                                                                                                                                                                                                                                                                                                                                                                                                                                              |
| 32                                               |                                                                                                                                                                                                                                                                                                                                                                                                                                                                                                                              |
| 33                                               |                                                                                                                                                                                                                                                                                                                                                                                                                                                                                                                              |
| 34                                               |                                                                                                                                                                                                                                                                                                                                                                                                                                                                                                                              |
| 35                                               |                                                                                                                                                                                                                                                                                                                                                                                                                                                                                                                              |
| 36                                               |                                                                                                                                                                                                                                                                                                                                                                                                                                                                                                                              |
| 37                                               |                                                                                                                                                                                                                                                                                                                                                                                                                                                                                                                              |
| 38                                               |                                                                                                                                                                                                                                                                                                                                                                                                                                                                                                                              |
| 39                                               |                                                                                                                                                                                                                                                                                                                                                                                                                                                                                                                              |
| 40                                               |                                                                                                                                                                                                                                                                                                                                                                                                                                                                                                                              |
| 41                                               |                                                                                                                                                                                                                                                                                                                                                                                                                                                                                                                              |
| 42                                               |                                                                                                                                                                                                                                                                                                                                                                                                                                                                                                                              |
| 43                                               |                                                                                                                                                                                                                                                                                                                                                                                                                                                                                                                              |
| 44                                               |                                                                                                                                                                                                                                                                                                                                                                                                                                                                                                                              |
| 45                                               |                                                                                                                                                                                                                                                                                                                                                                                                                                                                                                                              |
| 46                                               |                                                                                                                                                                                                                                                                                                                                                                                                                                                                                                                              |
| 47                                               |                                                                                                                                                                                                                                                                                                                                                                                                                                                                                                                              |
| 48                                               |                                                                                                                                                                                                                                                                                                                                                                                                                                                                                                                              |
| 49                                               |                                                                                                                                                                                                                                                                                                                                                                                                                                                                                                                              |
| 50                                               |                                                                                                                                                                                                                                                                                                                                                                                                                                                                                                                              |
| 51                                               |                                                                                                                                                                                                                                                                                                                                                                                                                                                                                                                              |
| 52                                               |                                                                                                                                                                                                                                                                                                                                                                                                                                                                                                                              |
| 53                                               |                                                                                                                                                                                                                                                                                                                                                                                                                                                                                                                              |
| 54                                               |                                                                                                                                                                                                                                                                                                                                                                                                                                                                                                                              |
| 55                                               |                                                                                                                                                                                                                                                                                                                                                                                                                                                                                                                              |
| 56                                               |                                                                                                                                                                                                                                                                                                                                                                                                                                                                                                                              |
| 57                                               |                                                                                                                                                                                                                                                                                                                                                                                                                                                                                                                              |
| 58                                               |                                                                                                                                                                                                                                                                                                                                                                                                                                                                                                                              |
| 59                                               |                                                                                                                                                                                                                                                                                                                                                                                                                                                                                                                              |
| 60                                               |                                                                                                                                                                                                                                                                                                                                                                                                                                                                                                                              |
| 44                                               | Percentage of patients 18 and older with CKD who have a record of blood pressure measurement in the previous 15 months [11].                                                                                                                                                                                                                                                                                                                                                                                                 |
| 45                                               | Percentage of patients 18 and older with CKD in whom the last blood pressure reading, measured in the previous X months, is 140/85 or less [10, 11, 13].                                                                                                                                                                                                                                                                                                                                                                     |
| 46                                               | CKD patients (all CKD, CKD patients eGFR<60, and CKD patients ACR >=30) at target blood pressure [2, 8, 19].                                                                                                                                                                                                                                                                                                                                                                                                                 |
| 47                                               | Proportion of patients with CKD and follow-up for at least 6 months, whose last recorded BP was within the target range specified unless specifically contraindicated. (SBP should be lowered to <140 mmHg (target range 120-139mmHg) and the DBP to <90mmHg for the majority. For those with diabetes mellitus or proteinuria of 1g/24 hours or greater, the SBP should be lowered to <130 mmHg (target range 120-129mmHg) and the DBP to <80mmHg unless the risks are considered to outweigh the potential benefits) [14]. |
| 48                                               | Proportion of patients with CKD and hypertension, followed up for at least 6 months, with a systolic blood pressure <120mmHg in the absence of cardiac failure [14].                                                                                                                                                                                                                                                                                                                                                         |
| 49                                               | Proportion of people with higher levels of proteinuria with a recording of blood pressure in the previous 9 months [7].                                                                                                                                                                                                                                                                                                                                                                                                      |
| 50                                               | Proportion of people with higher levels of proteinuria with a recording of blood pressure in the previous 9 months, whose latest systolic blood pressure reading is in the range 120–129 mmHg and diastolic blood pressure below 80 mmHg [7].                                                                                                                                                                                                                                                                                |
| 51                                               | Most recent BP <140/90 mmHg for patients with CKD without proteinuria, Most recent BP <130/80 mmHg for patients with CKD with proteinuria (Proteinuria defined as albumin to creatinine ratio >300 mg/g or >300 mg of albumin in the urine per 24 hrs or protein to creatinine ratio >0.3 mg/g) [20].                                                                                                                                                                                                                        |
| 52                                               | Proportion of proteinuric CKD patients without contraindications who have an ACEI or ARB on their last recorded list of chronic medications [14].                                                                                                                                                                                                                                                                                                                                                                            |
| 53                                               | Prescription of ACE-Inhibitor or Angiotensin Receptor Blocker recorded in past year for patients with CKD and hypertension with proteinuria [20].                                                                                                                                                                                                                                                                                                                                                                            |
| 54                                               | Percentage of patients with CKD, age 18 and older, with hypertension and proteinuria who are treated with an angiotensin converting enzyme inhibitor (ACE-I) or angiotensin receptor blocker (ARB) (unless a contraindication or side effects are recorded) [10, 11, 13, 14].                                                                                                                                                                                                                                                |
| 55                                               | Utilization of medications for hypertension [2].                                                                                                                                                                                                                                                                                                                                                                                                                                                                             |
| <b>3.2 Diabetes &amp; Chronic Kidney Disease</b> |                                                                                                                                                                                                                                                                                                                                                                                                                                                                                                                              |
| 56                                               | eGFR measured in past year for patients with diabetes and/or hypertension [20].                                                                                                                                                                                                                                                                                                                                                                                                                                              |
| 57                                               | People with diabetes who have received nine care processes at their annual health check: weight and BMI measurements, blood pressure, smoking status, blood test (HbA1c or blood glucose levels), urinary albumin test (or protein test to measure kidney function), serum creatinine test (indicator for renal function), cholesterol levels , eye check (retinopathy screening) , foot check [5].                                                                                                                          |

|                                                                |                                                                                                                                                                                                                                                |
|----------------------------------------------------------------|------------------------------------------------------------------------------------------------------------------------------------------------------------------------------------------------------------------------------------------------|
| 58                                                             | In patients with type 2 diabetes: laboratory values at the most recent clinic visit (serum creatinine, hemoglobin, hemoglobin A1c, ferritin, albumin, phosphate, calcium, alkaline phosphates, low-density lipoprotein) [12].                  |
| 59                                                             | Percent of persons 65 years of age and over with type 1 or type 2 diabetes and chronic kidney disease who receive medical evaluation with serum creatinine, microalbuminuria, HbA1c, lipids, and eye examinations [4].                         |
| 60                                                             | In patients with type 2 diabetes: blood pressure at the most recent clinic visit [12].                                                                                                                                                         |
| 61                                                             | Proportion of people with diabetes and microalbuminuria with a recording of blood pressure in the previous 9 months. [7].                                                                                                                      |
| 62                                                             | Proportion of people with diabetes and microalbuminuria with a recording of blood pressure in the previous 9 months, whose latest systolic blood pressure reading is in the range 120–129 mmHg and diastolic blood pressure below 80 mmHg [7]. |
| 63                                                             | Proportion of patients with diabetes mellitus and microalbuminuria (without specific contraindications) who had an ACEI or ARB on their last recorded list of chronic medications [4, 13, 14].                                                 |
| 64                                                             | Proportion of patients receiving an ACEI or ARB for diabetes and microalbuminuria who received the maximum licensed antihypertensive dose (or maximum dose tolerated without hypotension) on their most recent prescription. [14].             |
| 65                                                             | Percentage of patient population, age 18 and older, with diabetes mellitus who received testing for nephropathy screening (for example, albumin/creatinine ratio, microalbuminuria) within the past 12 months [1].                             |
| 66                                                             | Proportion of patients with diabetic nephropathy and follow-up for at least 6 months, whose last recorded HBA1C was below their agreed target [14].                                                                                            |
| 67                                                             | Average HBA1C of all patients with diabetes mellitus and CKD [14].                                                                                                                                                                             |
| 68                                                             | Record of glycated haemoglobin concentrations in IFCC (mmol/mol) and HBA1C% [14].                                                                                                                                                              |
| <b>3.3 Lipids</b>                                              |                                                                                                                                                                                                                                                |
| 69                                                             | Percentage of patients aged 18 years and older with a diagnosis of CKD (stage 3, 4 or 5, not receiving renal replacement therapy) who had a fasting lipid profile performed at least once within a 12-month period [9, 17, 20].                |
| 70                                                             | Cholesterol concentrations in patients prescribed HMG CoA reductase inhibitors [14].                                                                                                                                                           |
| 71                                                             | Record of prescribed statins allied to indications and comorbidities of patients [14].                                                                                                                                                         |
| <b>3.4 Cardiovascular Disease &amp; Chronic Kidney Disease</b> |                                                                                                                                                                                                                                                |
| 72                                                             | Cardiovascular disease & pharmacological interventions, by CKD status (all CKD, stage 1-2, stage 3, stage 4-5): ACEI/ARB, Beta blocker [8].                                                                                                    |
| 73                                                             | Percentage of patients with a diagnosis of stable coronary artery disease and chronic kidney disease who are prescribed an ACE inhibitor or ARB [6].                                                                                           |
| 74                                                             | Cardiovascular disease (CHF, AMI, Stroke, CHF and AMI, CHF and Stroke, AMI and Stroke, CHF and AMI and Stroke) in patients with CKD [8].                                                                                                       |
| 75                                                             | Heart failure in patients with or without CKD (systolic, diastolic, systolic and diastolic, unspecified) [8].                                                                                                                                  |

| <b>3.5 Lifestyle</b>                |                                                                                                                                                                                                                                                                                                                                                                                                             |
|-------------------------------------|-------------------------------------------------------------------------------------------------------------------------------------------------------------------------------------------------------------------------------------------------------------------------------------------------------------------------------------------------------------------------------------------------------------|
| 76                                  | The percentage of patients with CKD whose notes record smoking status in the preceding 12 months [10, 14].                                                                                                                                                                                                                                                                                                  |
| 77                                  | The percentage of patients with CKD who are recorded as current smokers who have a record of an offer of support and treatment within the preceding 12 months [10, 14].                                                                                                                                                                                                                                     |
| 78                                  | Proportion of smoking CKD patients who ceased smoking during the past year [14].                                                                                                                                                                                                                                                                                                                            |
| 79                                  | Proportion of patients with CKD and obesity who have received dietary advice to assist weight loss [14].                                                                                                                                                                                                                                                                                                    |
| 80                                  | Proportion of patients with CKD who have received dietary advice to assist dietary sodium restriction [14].                                                                                                                                                                                                                                                                                                 |
| 81                                  | Proportion of patients with CKD stages 1–3 and hyperkalaemia or hyperphosphataemia who have received dietary advice to assist dietary restriction of potassium and phosphate [14].                                                                                                                                                                                                                          |
| 82                                  | Proportion of patients with CKD who have received advice to undertake regular exercise [14].                                                                                                                                                                                                                                                                                                                |
| 83                                  | Proportion of patients with CKD who report performing regular moderate exercise [14].                                                                                                                                                                                                                                                                                                                       |
| <b>4.0 Referral to a Specialist</b> |                                                                                                                                                                                                                                                                                                                                                                                                             |
| 84                                  | Referral to a nephrologist by primary care physicians prior to ESRD [2].                                                                                                                                                                                                                                                                                                                                    |
| 85                                  | Referral to a nephrologist for eGFR<30 [20].                                                                                                                                                                                                                                                                                                                                                                |
| 86                                  | Proportion of CKD patients who were not referred to a nephrologist when they should have been (based on the three criteria: Nephrologists should participate in the care of CKD patients when a) eGFR<30 mL/min/1.73 m <sup>2</sup> ; b) there is a significant change in eGFR or; c) there is evidence of high proteinuria (PCR >100 mg/mmol, ACR >60 mg/mmol or protein present in 2/3 of samples)) [21]. |
| 87                                  | Proportion of patients with CKD with an indication for referral who have been referred to a Nephrology Department [14, 19].                                                                                                                                                                                                                                                                                 |
| 88                                  | Cumulative probability of a physician visit by month 12 after CKD diagnosis, and after stage 3 CKD diagnosis by physician specialty (primary care, cardiology, nephrology) and demographics [8].                                                                                                                                                                                                            |
| 89                                  | Proportion of patients with persistent nonvisible/microscopic haematuria in the absence of significant proteinuria or a reduced GFR that were referred to a Urology Department [14].                                                                                                                                                                                                                        |

### References for Indicators

- [1] Canadian Institute for Health Information. Pan-Canadian primary health care indicator update report. Ottawa (ON); 2012 Nov. Available from: <https://secure.cihi.ca/estore/productFamily.htm?locale=en&pf=PFC2000&lang=en>
- [2] Saran R, Hedgeman E, Plantinga L, et al.; for the CKD Surveillance Team. Establishing a national chronic kidney disease surveillance system for the United States. *Clin J Am Soc Nephrol.* 2010;5(1):152-161.
- [3] Health Indicators Warehouse [Internet]. Health indicators warehouse: chronic kidney disease: adults [cited 2013 Dec 11]. National Health and Nutrition Examination Survey (NHANES). Available from: [http://healthindicators.gov/Indicators/Chronic-kidney-disease-percent\\_483/Profile](http://healthindicators.gov/Indicators/Chronic-kidney-disease-percent_483/Profile)
- [4] Health Indicators Warehouse [Internet]. Medical evaluation: chronic kidney disease & diabetes older adults [cited 2013 Dec 11]. United States Renal Data System (USRDS). Available from: [http://healthindicators.gov/Indicators/Medical-evaluation-older-adults-with-chronic-kidney-disease--diabetes-percent\\_478/Profile/](http://healthindicators.gov/Indicators/Medical-evaluation-older-adults-with-chronic-kidney-disease--diabetes-percent_478/Profile/) Data Source: United States Renal Data System
- [5] National Health Service. CCG Outcomes indicator set 2013/14: technical guidance first. London (UK); 2012 Dec. Available from: <http://www.google.ca/url?sa=t&rct=j&q=&esrc=s&source=web&cd=2&cad=rja&ved=0CDsQFj>

- 1 AB&url=http%3A%2F%2Fwww.england.nhs.uk%2Fwp-  
 2 content%2Fuploads%2F2012%2F12%2Fccg-ois-tech-  
 3 guide.pdf&ei=touSURCmAsmS2AX\_uIHYDg&usg=AFQjCNFM9VMVnW\_3bc054dqC9u72W  
 4 T0DuA&sig2=VE7RzZHgA-raIqi-eHA65g&bvm=bv.56988011,d.b2I  
 5  
 6 [6] Goblirsch G, Bershow S, Cummings K, et al. Stable coronary artery disease. Institute for  
 7 Clinical Systems Improvement. 2013 May.  
 8  
 9 [7] National Institute for Health and Care Excellence [Internet]. Chronic kidney disease quality  
 10 standard [updated 2011 Mar; cited 2013 Dec 11]. Available from:  
 11 <http://publications.nice.org.uk/chronic-kidney-disease-quality-standard-qs5/list-of-statements>  
 12 [8] United States Renal Data System. 2013 annual data report. Ann Arbor (MI); 2013. Available  
 13 from: <http://www.usrds.org/adr.aspx>  
 14 [9] American Medical Association. 2013 physician quality reporting system: chronic kidney  
 15 disease (CKD) Measures Group. Chicago (IL); 2013.  
 16 [10] National Health Service, British Medical Association, National Health Service Employers.  
 17 2013/14 general medical services (GMS) contract quality and outcomes framework (QOF):  
 18 guidance for GMS contract 2013/14. London (UK); 2013. Available from:  
 19 [www.nhsemployers.org/Aboutus/Publications/Documents/qof-2013-14.pdf](http://www.nhsemployers.org/Aboutus/Publications/Documents/qof-2013-14.pdf)  
 20 [11] Thomas N, Loud F. Managing chronic kidney disease in primary care: a quality  
 21 improvement study. Renal Society of Australasia Journal. 2012;8(3):152-157.  
 22 [12] Patapas JM, Blanchard AC, Iqbal S, Vasilevski M, Dannenbaum D. Management of  
 23 aboriginal and nonaboriginal people with chronic kidney disease in Quebec: quality-of-care  
 24 indicators. Canadian Family Physician. 2012;58:e107-12.  
 25 [13] National Health Service. NHS atlas of variation in healthcare for people with kidney  
 26 disease. London (UK); 2012 June. Available from:  
 27 <http://www.rightcare.nhs.uk/index.php/atlas/kidneycare>  
 28 [14] Mactier R, Davies S, Dudley C, et al. Summary of audit measures for the 5th edition of the  
 29 Renal Association clinical practice guidelines (2009 – 2012). Nephron Clin Pract. 2011;118  
 30 Suppl 1:c27-70.  
 31 [15] Micah TL, Smith DH, Johnson ES, et al. Proteinuria among patients with chronic kidney  
 32 disease: a performance measure for improving patient outcomes. Joint Commission Journal on  
 33 Quality and Patient Safety. 2012;38(6):277-282.  
 34 [16] United States Department of Health and Human Services Agency for Healthcare Research  
 35 and Quality [Internet]. HHS Measure Inventory [updated 2013 Apr; cited 2013 Dec 11].  
 36 Submitted by the Indian Health Service. Available from:  
 37 <http://www.qualitymeasures.ahrq.gov/hhs/inventory.aspx#browseType=current>  
 38 [17] United States Department of Health and Human Services, Agency for Healthcare Research  
 39 and Quality [Internet]. HHS Measure Inventory [updated 2013 Apr; cited 2013 Dec 11].  
 40 Submitted by the Office of the Assistant Secretary for Health (Originally submitted by the Office  
 41 of Public Health and Science; 2008). Available from:  
 42 <http://www.qualitymeasures.ahrq.gov/hhs/inventory.aspx#browseType=current>  
 43 [18] US Department of Health and Human Services Agency for Healthcare Research and Quality  
 44 [Internet]. HHS Measure Inventory [updated 2013 Mar; cited 2013 Dec 11]. Submitted by  
 45 Centers for Medicare & Medicaid Services. Available from:  
 46 <http://www.qualitymeasures.ahrq.gov/hhs/inventory.aspx#browseType=current>  
 47 [19] Centers for Disease Control and Prevention. Chronic kidney disease surveillance system.  
 48 Atlanta (GA): U.S. Department of Health and Human Services; 2011. Available from:  
 49 <http://www.cdc.gov/ckd>  
 50 [20] Litvin CB, Ornstein SM. Management of chronic kidney disease in primary care practice.  
 51 Poster Presentation at the 40th annual meeting of the North American Primary Care Research  
 52 Group (NAPCRG); 2012 Dec 1-5; New Orleans, LA.

1 [21] Garg A, Shariff S, Nash D, Fleet J. Quality of care indicators for chronic kidney disease  
2 patients: a report for the Ontario Renal Network.. Toronto (ON); , Kidney, Dialysis and  
3 Transplantation Research Program, Institute for Clinical Evaluative Sciences; 2012 Aug 9.  
4  
5

### 6 **References for Guidelines**

7 [CPG1a] National Kidney Foundation. KDOQI clinical practice guideline for diabetes and CKD:  
8 2012 update. Am J Kidney Dis. 2012 Nov;60(5):850-86.  
9

10 [CPG1b] National Kidney Foundation. KDOQI™ clinical practice guidelines and clinical  
11 practice recommendations for diabetes and chronic kidney disease. Am J Kidney Dis.  
12 2007;49:Suppl 2:S1-S180.  
13

14 [CPG2] Levin A, Hemmelgarn B, Culeton B, et al.; Canadian Society of Nephrology.  
15 Guidelines for the management of chronic kidney disease. CMAJ. 2008 Nov 18;179(11):1154-  
16 62.

17 [CPG3] Kidney Disease: Improving Global Outcomes. KDIGO 2012 clinical practice guideline  
18 for the evaluation and management of chronic kidney disease. Kidney Inter. 2013;3:Suppl 3:1-  
19 150.  
20

21 [CPG4] Ministry of Health Malaysia [Internet]. Clinical practice guidelines: management of  
22 chronic kidney disease in adults. [updated 2011 Jun; cited 2013 Dec 11]. Available from:

23 [www.moh.gov.my](http://www.moh.gov.my)  
24  
25  
26  
27  
28  
29  
30  
31  
32  
33  
34  
35  
36  
37  
38  
39  
40  
41  
42  
43  
44  
45  
46  
47  
48  
49  
50  
51  
52  
53  
54  
55  
56  
57  
58  
59  
60
